1 **The cryo-EM structure of the chloroplast ClpP complex reveals an interaction**  
2 **with the co-chaperonin complex that inhibits ClpP proteolytic activity**

3 Ning Wang<sup>1,2\*</sup>, Yifan Wang<sup>2,3,\*</sup>, Qian Zhao<sup>1</sup>, Xiang Zhang<sup>3</sup>, Chao Peng<sup>4</sup>, Wenjuan  
4 Zhang<sup>1,2</sup>, Yanan Liu<sup>1,2</sup>, Olivier Vallon<sup>5</sup>, Michael Schroda<sup>6</sup>, Yao Cong<sup>3,#</sup>, Cuimin  
5 Liu<sup>1,2,#</sup>

6

7 <sup>1</sup> State Key Laboratory of Plant Cell and Chromosome Engineering, Institute of  
8 Genetics and Developmental Biology. The Innovative Academy of Seed Design,  
9 Chinese Academy of Sciences, Beijing, 100101, China

10 <sup>2</sup> University of Chinese Academy of Sciences, Beijing, 100101, China

11 <sup>3</sup> State Key Laboratory of Molecular Biology, National Center for Protein Science  
12 Shanghai, Shanghai Institute of Biochemistry and Cell Biology, Center for Excellence  
13 in Molecular Cell Science, Chinese Academy of Sciences, Shanghai 200031, China;  
14 Shanghai Science Research Center, Chinese Academy of Sciences, Shanghai, China  
15 201210

16 <sup>4</sup> National Facility for Protein Science in Shanghai, Zhangjiang Lab, Shanghai  
17 Advanced Research Institute, CAS, Shanghai 201210, China

18 <sup>5</sup> UMR7141 CNRS-Sorbonne Université, Institut de Biologie Physico-Chimique,  
19 Paris 75005, France

20 <sup>6</sup> Molecular Biotechnology & Systems Biology, TU Kaiserslautern, Paul-Ehrlich  
21 Straße 23, D-67663 Kaiserslautern, Germany

22

23 \* these authors contributed equally to this work

24 # Correspondence to: [cmliu@genetics.ac.cn](mailto:cmliu@genetics.ac.cn);

25 [cong@sibcb.ac.cn](mailto:cong@sibcb.ac.cn)

26 **Keywords: Chaperone; Protease; Protein homeostasis; Photosynthesis; Rubisco;**  
27 *Chlamydomonas reinhardtii*

## 28 **Abstract**

29 Protein homeostasis in plastids is strategically regulated by the protein quality control  
30 system involving multiple chaperones and proteases, among them the Clp protease.  
31 We determined the structure of the chloroplast ClpP complex from *Chlamydomonas*  
32 *reinhardtii* by cryo-EM. ClpP contains two heptameric catalytic rings without any  
33 symmetry. The top ring contains one ClpR6, three ClpP4 and three ClpP5 subunits  
34 while the bottom ring is composed of three ClpP1<sub>C</sub> subunits and one each of the  
35 ClpR1-4 subunits. ClpR3, ClpR4 and ClpT4 subunits connect the two rings and  
36 stabilize the complex. The chloroplast Cpn11/20/23 co-chaperonin, a co-factor of  
37 Cpn60, forms a cap on the top of ClpP by protruding mobile loops into hydrophobic  
38 clefts at the surface of the top ring. The co-chaperonin repressed ClpP proteolytic  
39 activity *in vitro*. By regulating Cpn60 chaperone and ClpP protease activity, the  
40 co-chaperonin may play a role in coordinating protein folding and degradation in the  
41 chloroplast.

42

## 43 **INTRODUCTION**

44 Sophisticated pathways within cells control and regulate the biogenesis, trafficking  
45 and degradation of proteins to ensure protein homeostasis (proteostasis). These  
46 pathways belong to the protein quality control (PQC) system that involves the  
47 participation of various chaperones and proteases<sup>1-5</sup>. Molecular chaperones act as key  
48 components of the PQC system. They assist protein folding when new polypeptide  
49 chains emerge from ribosomes, when proteins have translocated through membranes,  
50 and when proteins become misfolded. Proteases are another important component of  
51 the PQC system that recognize and degrade substrate proteins which cannot fold or  
52 refold to the native state.

53 The molecular chaperone chaperonin is a tetradecameric cylinder formed by two  
54 rings stacked back to back, whose central cavity is used to shield a bound unfolded

55 protein from the crowded environment and to assist its folding to the native state in an  
56 ATP-dependent process <sup>6</sup>. A co-chaperonin complex seals the central cavity of group I  
57 chaperonins to form the isolated folding environment. In bacteria, this lid is formed  
58 by the homo-heptameric GroES co-chaperonins. In plastids, two types of  
59 co-chaperonin subunits exist, Cpn10 and Cpn20, the latter formed by two  
60 co-chaperonin domains in tandem. In addition to its role as a co-chaperonin for Cpn60,  
61 Cpn20 has been shown in *Arabidopsis* to mediate superoxide dismutase (FeSOD)  
62 activation independent of the Cpn60 chaperonin <sup>7</sup>. In addition, the expression level of  
63 the *Cpn20* gene influenced the physiological function of ABA signaling during seed  
64 germination and promoted stomatal closure without Cpn60 involvement <sup>8, 9</sup>. These  
65 results indicate that the Cpn20 protein might exhibit biochemical functions in addition  
66 to that as a co-factor for Cpn60 in protein folding.

67 In bacterial cells or endosymbiotic organelles, proteins are degraded by many  
68 types of proteases including serine-, aspartate-, and threonine-proteases <sup>10, 11</sup>. The Clp  
69 protease is a conserved serine protease that consists of the ClpP core complex and  
70 assistant chaperones <sup>12</sup>. The first crystal structure of the *E. coli* ClpP core complex  
71 revealed a barrel composed of two stacked heptameric rings, with one catalytic triad  
72 in each subunit <sup>13</sup>. The degradation of protein substrates by the Clp protease in *E. coli*  
73 is assisted by two hexameric AAA+ (ATPase Associated with multiple cellular  
74 Activities) chaperones, ClpX and ClpA, both of which can bind to the ClpP core  
75 complex via one of its surfaces <sup>14</sup>. Fueled by ATP hydrolysis, substrate proteins are  
76 unfolded by ClpX or ClpA and threaded into the central cavity of the ClpP core  
77 complex <sup>14</sup>, where the substrate is degraded. Recent studies have explored the  
78 functional significance of the symmetry mismatch between the AAA+ chaperone  
79 hexamer and the heptamer of the ClpP core complex in *E. coli* <sup>15-18</sup>. In particular, it  
80 has been proposed to induce a rotational movement between the AAA+ ATPase and  
81 the ClpP core and to participate in substrate transport <sup>16</sup>.

82 In mitochondria, the ClpP core consists of 14 identical subunits that are similar  
83 to their bacterial homologs <sup>19</sup>. In contrast, the ClpP core complex in chloroplasts is

84 made up of three types of subunits termed ClpP, ClpR, and ClpT. ClpR subunits are  
85 homologous to ClpP but cannot contribute to catalysis because they lack one or more  
86 of the active residues of the Ser-His-Asp catalytic triad. ClpT proteins are completely  
87 different proteins of around 20 kDa that share homology with the N-terminal domain  
88 of the AAA+ chaperones. ClpT subunits have been proposed to link the two  
89 heptameric rings and thus maintain the stability of the tetradecameric ClpP core<sup>20-23</sup>.  
90 In the green alga *Chlamydomonas reinhardtii*, the subunits of the chloroplast ClpP  
91 core complex are encoded by three *ClpP* genes (*clpP1*, *CLPP4*, *CLPP5*, the former  
92 chloroplast-encoded), five *ClpR* genes (*CLPR1-4*, *CLPR6*) and two *ClpT* genes  
93 (*CLPT3*, *CLPT4*)<sup>24, 25</sup>. The plastidial *clpP1* gene produces ClpP<sub>1H</sub>, which can be  
94 further processed by unknown peptidases to generate ClpP<sub>1N</sub>, ClpP<sub>1C</sub> and ClpP<sub>1C'</sub>  
95 subunits which are part of the ClpP core complex<sup>26</sup>. Translational attenuation of  
96 *clpP1* in *Chlamydomonas* led to the stabilization of misassembled photosynthetic  
97 enzymes<sup>27</sup>, while its conditional repression caused serious autophagy responses and  
98 activated the protein quality control system<sup>28</sup>. In *Arabidopsis* chloroplasts, the ClpP  
99 complex consists of five ClpP type subunits (ClpP3-6 and ClpP1), four ClpR type  
100 subunits (ClpR1-4) and two ClpT type subunits (ClpT1-2)<sup>20, 22, 29</sup>. Loss of *ClpP5*  
101 gene function was embryo-lethal<sup>30</sup>. Although the R-type subunits were considered  
102 unable to degrade substrate proteins, either *ClpR2* or *ClpR4* gene knockout resulted in  
103 delayed embryogenesis suggesting their functional importance<sup>30</sup>. These results  
104 indicate that the Clp protease plays an essential role in maintaining protein  
105 homeostasis in chloroplasts, even though some subunits can be substituted by others.  
106 It was observed previously that the co-chaperonin Cpn20 interacts with the ClpP  
107 complex<sup>20</sup>, but how this interaction takes place and whether it has functional  
108 implications are not known.

109       Recently, several structures of the Clp machinery composed of core complex and  
110 AAA+ chaperone have been resolved by cryo-EM. However these studies focused on  
111 bacterial Clp machineries, while there is no high-resolution structure of chloroplast  
112 Clp, yet<sup>15-17, 31</sup>. In this study, we solved the cryo-EM structure of the *Chlamydomonas*

113 chloroplast ClpP core complex. The complex is asymmetrical and polypeptide chains  
114 could be assigned to a known Clp gene. Furthermore, the co-chaperonin complex was  
115 observed to bind to the top ring of the ClpP core without inducing a major  
116 conformational change. We hypothesize that co-chaperonins act as regulatory factors  
117 in chloroplast proteostasis.

118

## 119 **RESULTS**

### 120 **Co-chaperonins inhibit ClpP proteolytic activity via a direct interaction**

121 In previous work, the ClpP complex has been purified from *Chlamydomonas*  
122 *reinhardtii* chloroplasts by Strep-tag affinity purification and the complex subunits  
123 have been assigned to P-, R- and T-type by mass spectrometry<sup>32</sup>. Based on that work,  
124 we improved the purification strategy by combining affinity purification with multiple  
125 chromatography steps to obtain large amounts of highly purified *Chlamydomonas*  
126 ClpP complexes. The purified complexes were separated on a 12%-18% SDS gel and  
127 on a native gel and proteins were visualized by Coomassie staining (Figs. 1A and 1B).  
128 In the native gel, the purified ClpP complex migrated as a diffuse band with a  
129 molecular mass below the 820 kDa of oligomeric Cpn60 (Fig. 1B). By Asymmetric  
130 Flow Field Flow Fractionation (AFFFFF) we calculated a molecular mass of 549 kDa  
131 for the ClpP complex, which is much larger than the 240 kDa of *E. coli* ClpP (Fig.  
132 S1A). Each visible protein band in the SDS gel was cut out and analyzed by mass  
133 spectrometry, and the bands identified as Clp or co-chaperonin subunits are marked  
134 (Fig. 1A) (Dataset 1). Though the migration pattern of Clp subunits was slightly  
135 different from the previous report due to difference in protein preparation and  
136 SDS-PAGE conditions, the same major Clp subunits were identified, except for ClpT3  
137 (Table S1)<sup>32</sup>. In addition to the Clp subunits, the three co-chaperonin proteins Cpn11,  
138 Cpn20, and Cpn23 were identified with notable abundance (Table S1)(Dataset 1). The  
139 presence of *clpP1* gene products ClpP<sub>1H</sub>, ClpP<sub>1C</sub> and ClpP<sub>1C'</sub> and of Cpn20 in the  
140 purified ClpP complex was confirmed by immunoblotting using antisera against the  
141 Strep-tag and against Cpn20 (Fig. 1C). It is of note that the two bands detected for

142 both ClpP<sub>1C</sub> and ClpP<sub>1C'</sub> might result from the differentiated peptidase processing. To  
143 confirm the interaction of the Clp complex with the co-chaperonins, we performed a  
144 co-immunoprecipitation experiment using Cpn20 antiserum. As shown in Fig. 1D,  
145 Clp subunits ClpP<sub>1C</sub>, ClpP<sub>4</sub>, ClpR<sub>6</sub>, and ClpT<sub>4</sub> were detected in the  
146 immunoprecipitate by immunoblotting. The interaction between the ClpP complex  
147 and chaperonins *in vitro* was further validated by size exclusion chromatography (Fig.  
148 1E). Some of recombinantly produced Cpn20 co-migrated with the *Chlamydomonas*  
149 ClpP complex, and co-migration was even more marked with a mixture of the three  
150 co-chaperonins Cpn11/20/23. Note that Cpn20 was also detected after long time  
151 exposure in the ClpP-only fractions (CrClpP row) because the co-chaperonin complex  
152 co-purifies with endogenous ClpP. No co-migration of Cpn subunits was observed  
153 with the *E. coli* ClpP complex, and the *E. coli* co-chaperonin GroES co-migrated  
154 neither with *Chlamydomonas* nor *E. coli* ClpP. These results indicate that the  
155 interaction between the co-chaperonin and the ClpP complex can be reconstituted *in*  
156 *vitro* and is a specific feature of the chloroplast system. This conclusion is in line with  
157 the finding that *Arabidopsis* Cpn20 interacts with the *Arabidopsis* Clp complex *in*  
158 *vivo* <sup>20</sup>.

159 Beta-casein is a commonly used model substrate for the Clp protease  
160 (Caseino-Lytic Peptidase) <sup>33, 34</sup>. To analyze protease activities of purified ClpP  
161 complexes, we performed protein degradation assays. ClpP of *E. coli* (EcClpP) could  
162 not degrade  $\beta$ -casein, unless 4  $\mu$ M of the ClpP activator acyldepsipeptide (ADEP) was  
163 present in the reaction (Figs. 2A, 2B and S2A). ADEP increases the interaction  
164 between ClpP monomers, competes with the Clp ATPases for their binding sites on  
165 ClpP, and triggers a closed- to open-gate transition of the substrate entrance pore,  
166 which is otherwise tightly closed <sup>35, 36</sup>. In contrast, purified *Chlamydomonas* ClpP was  
167 able to degrade  $\beta$ -casein without need for ADEP. ADEP slightly accelerated protein  
168 degradation by CrClpP, but only at a high concentration of 18  $\mu$ M, not of 4 or 8  $\mu$ M  
169 (Figs. 2A, 2B and S2A). Given the specific interaction between *Chlamydomonas* ClpP  
170 and the co-chaperonin complex (Fig. 1), we wondered whether co-chaperonins had an

171 effect on ClpP proteolytic activity. Recombinant co-chaperonins Cpn20 and  
172 Cpn11/20/23 both slowed down the proteolytic activity of CrClpP (Figs. 2C and 2D),  
173 but co-chaperonin GroES had no effect (Figs. S2A and S2B). This inhibitory effect  
174 was overcome by the addition of 18  $\mu$ M ADEP (Figs. 2C and 2D). CrClpP hydrolyzed  
175  $\beta$ -casein into several fragments of lower molecular mass ranging from 15 to 20 kDa,  
176 which were not observed with EcClpP (Fig. S2A). Hence, casein degradation by  
177 CrClpP appeared less processive than by EcClpP+ADEP. Moreover, Cpn20 was still  
178 bound to the CrClpP complex after incubation with 18  $\mu$ M ADEP (Fig. S2C),  
179 indicating that either ADEP and the co-chaperonin bind to different sites on the ClpP  
180 core complex or ADEP cannot expel the co-chaperonin from its binding sites. As tiny  
181 amounts of AAA+ chaperones might have co-purified with CrClpP, we cannot  
182 conclude that CrClpP is proteolytically active in the complete absence of AAA+  
183 chaperones. However, treatment with hexokinase/glucose, which will remove all ATP  
184 from the buffer, had no effect on casein degradation (Fig. S2A), suggesting that  
185 CrClpP can degrade this substrate in a completely energy-independent process.

### 186 **Cryo-EM structure of the purified ClpP complex and subunit assignment**

187 To analyze structural features of the *Chlamydomonas* plastidic ClpP complex, we  
188 performed cryo-EM single particle analysis on the system. Purified ClpP complexes  
189 were applied to specimen grids and vitrified for cryo-EM analysis (Figs. S3 and S4).  
190 After 3D classification and iterative refinement, the optimally visualized particle  
191 groups were selected to generate two major groups, named ClpP-S1 and ClpP-S2, at  
192 resolutions of 3.3 Å and 3.6 Å, respectively. The main difference between these two  
193 groups was the appearance of a small cap in the latter particles (Figs. 3A-B and S3C,  
194 S4A, S4C-D). Focused 3D classification, particle re-extraction, re-centering and  
195 refinement of the cap, which was later identified as co-chaperonin Cpn11/20/23,  
196 generated particles with better structural features and more complete mobile loops at  
197 4.8 Å resolution (Figs. S3C and S4B). We further combined the 4.8 Å Cpn11/20/23  
198 and ClpP-S2 maps using the *vop maximum* command in Chimera and generated a  
199 ClpP-S2-composite map (ClpP-S2c)(Figs. 3B and S3C). The ClpP-S1 map displayed

200 an obviously asymmetric structural conformation with a height of about 108 Å, a  
201 width of about 105 Å and a length of about 148 Å. The diameters of the central pore  
202 of ClpP-S1 are 28 Å and 20 Å for the top and bottom rings in the cut away views,  
203 respectively (Fig. 3A). This difference in pore size implied that there may exist a  
204 functional division between top and bottom ring in terms of substrate admittance. The  
205 cap in the ClpP-S2 particles increased the height to about 150 Å and the width to 118  
206 Å, while the length was the same as ClpP-S1 (Figs. 3A and 3B). Overall, the  
207 resolution in the middle of the particles was higher than on the surface (Fig. S4D),  
208 especially for ClpP-S1 where the resolution in the particle core reached about 3 Å,  
209 which allows the identification of amino acid side chains.

210 To analyze the structural features of the CrClpP complex, the crystal structure of  
211 the *E.coli* ClpP complex (PDB : 1TYF) was manually docked into the CrClp-S1  
212 density map (Fig. 3C)<sup>13</sup>. The EcClpP structure fits well into the ClpP-S1 map around  
213 the central pore, with clear separation of double rings. Compared to the symmetrical  
214 EcClpP structure, three prominent additional densities appeared in ClpP-S1 that were  
215 labeled respectively as A1, A2 and A3. The A1 density is very large and locates  
216 adjacent to the interface of the two rings like a handle, while densities A2 and A3  
217 appear to be more similar and locate to the peripheral region of the top ring.

218 In *Chlamydomonas*, three P-type (ClpP1, P4, P5), five R-type (ClpR1-4, R6) and  
219 two T-type (ClpT3, T4) subunits constitute the ClpP complex. ClpP<sub>H</sub> is processed by  
220 unknown peptidases to generate ClpP<sub>N</sub>, ClpP<sub>C</sub> and ClpP<sub>C'</sub> subunits, which are part  
221 of the ClpP core complex. An alignment of amino acid sequences of P- and R-type  
222 subunits with EcClpP revealed a conserved region corresponding roughly to amino  
223 acids 27-175 in EcClpP (Figs. S5), which served to build the structures of the P- and  
224 R-type subunits (Fig. S6A). The structure of ClpP<sub>N</sub> could not be built after many  
225 trials. To assign the subunits into the ClpP core complex, the 14 subunits in the  
226 complex were designated as D1-D14 (Fig. 4A, left) and the individually built  
227 structures were manually fit into the central region of the ClpP-S1 map. Some specific  
228 sequences of ClpP and ClpR subunits were used for assigning them to the ClpP-S1



229 map (underlined in Fig. S5). Visualizations of map fitting of specific side chains  
230 allowed us to identify subunit locations in the Clp-S1 map (Fig. S6B).

231 After subunit assignment into the ClpP-S1 map, the individual subunit structures  
232 were built manually with continuous map densities. The structures of the N- and  
233 C-termini of some subunits could not be solved due to discontinuity in the densities.  
234 Information on the resolved sequences is summarized in Table S2. The  
235 superimposition of the individual subunit structure onto its corresponding electron  
236 density indicates that the models fit well into the corresponding maps (Fig. S7A).  
237 Overall, we could assign one ClpR6, three ClpP4, and three ClpP5 subunits to the top  
238 ring (designated as P-ring), and one of each ClpR1-4 and three ClpP1<sub>C</sub> subunits to the  
239 bottom ring (Figs. 4A-C). Values of around 0.7 in the correlation coefficient (CC)  
240 chart corroborate our model-to-map fitting for each subunit (Fig. S7B). Still, some  
241 regions in the ClpP structure could not be solved, as shown by white regions in the  
242 core complex map density (Figs. 4B and S7C). Notice that no subunits or sequences  
243 could be fit into the additional A2 and A3 maps (Fig. S7C), including the long  
244 C-terminal sequences (Val196-Trp296) of the adjacent ClpP4 subunit, which remains  
245 unsolved. Conversely, no density could be ascribed to the large IS1 sequence  
246 characteristic of ClpP1<sub>H</sub><sup>24, 26</sup>. The T4 subunit could be assigned to the A1 density,  
247 which is located adjacent to the interface of the two rings (Figs. 4B-C). The additional  
248 A1 map density, located at the interface of the two rings, is formed by a very long  
249 helix originating from the C-terminus of the ClpR3 subunit in the bottom ring, as well  
250 as by the T4 subunit and several amino acids from the ClpR6 subunit in the top ring  
251 (Fig. 4D). Some unassigned map density in A1 might be contributed by the  
252 C-terminus of ClpR3, and by ClpT3 or ClpP1<sub>N</sub> subunits. The A1 region connects the  
253 two rings like a handle and can be assumed to stabilize the ClpP core complex.  
254 Moreover, the C-terminus of ClpR4 protrudes into a region next to the ClpP5 subunits  
255 in the top ring, and this might contribute to stabilize the core complex, as well (Fig.  
256 4E).

257 The electrostatic potential is not equally distributed around the central pores of

258 the two rings through which substrates enter the catalytic chamber, suggesting a  
259 differential affinity to substrates (Fig. 4F). The AAA+ chaperones interacts with  
260 EcClpP by protruding their flexible IGF loops into the hydrophobic clefts of ClpP  
261 which are formed at the interface of two subunits <sup>16</sup>. Similarly, seven hydrophobic  
262 clefts were found to form at the surface of the top ring of ClpP by amino acids from  
263 two adjacent subunits. These hydrophobic clefts are arranged in a circular manner  
264 with seven-fold symmetry and were observed only on the top ring (Fig. 4G). However,  
265 we cannot completely rule out that similar hydrophobic clefts exist on the bottom ring,  
266 because the models of the three ClpP1c subunits in the bottom ring are not complete.  
267 A schematic model of the overall structure of the ClpP core complex with assigned  
268 subunits is shown in Fig. 4A.

### 269 **The cap on the top of the ClpP core complex is the co-chaperonin**

270 We have shown that the co-chaperonin complex interacts with the ClpP core *in vivo*  
271 and *in vitro* (Fig. 1). Previous work from us and others showed that the authentic  
272 co-chaperonin complex *in vivo* consists of two Cpn20 subunits, one Cpn23 subunit,  
273 and one Cpn11 subunit <sup>37, 38</sup>. Compared to Clp-S1, the ClpP-S2c map showed a  
274 dome-like density located on the top of the ClpP core complexes (Fig. 3, labeled A4 in  
275 Fig. S8A) which we attributed to the co-chaperonin. Since Cpn20 and Cpn23 each  
276 have two GroES-like domains, we split them into Cpn20-N, Cpn20-C, Cpn23-N, and  
277 Cpn23-C regions after cleavage of transit peptide <sup>39</sup> and performed a sequence  
278 alignment with Cpn11 and GroES (Fig. 5A). Sequences contributing to the roof of the  
279 dome-shaped co-chaperonin complex were present in GroES, Cpn23-N, Cpn23-C and  
280 Cpn20-C. This sequence was much shorter in Cpn11 and missing in Cpn20-N. Based  
281 on these specific roof characteristics we could assign Cpn11, Cpn23, and two Cpn20  
282 subunits (Cpn20-1 and Cpn20-2) to the co-chaperonin map (Fig. 5B). The CC chart  
283 indicates a good model-to-map fitting for both Clp and co-chaperonin subunits (Fig.  
284 S8B) and the superimposition of the individual co-chaperonin subunit structure onto  
285 its corresponding electron density indicates that the models fit well into the  
286 corresponding maps (Fig. S8C). We further refined the model and fit five of the seven

287 mobile loops into the densities that extended from the bottom of the co-chaperonin  
288 dome (belonging to the Cpn20 and Cpn11 subunits, Fig. 5B, left) (Fig. 5B, left). No  
289 densities were observed for the loops of the Cpn23 subunit, although the sequences  
290 are conserved (Fig. 5A).

291 Inspection of the map revealed that the co-chaperonin cap is tilted by about 4°  
292 relative to the ClpP symmetry axis (Figs. 5C and 5F). This tilt increases the distance  
293 between ClpP and Cpn23 versus ClpP and Cpn20, suggesting an intimate interaction  
294 at the Cpn20 side. A similar interaction, but with a tilt angle of 11°, has been observed  
295 for the asymmetrical EcClpP with its AAA+ chaperone ClpX<sup>16</sup>. While that interaction  
296 is accompanied by a symmetry mismatch, this is not the case for the interaction  
297 between co-chaperonin and ClpP, which share a 7-fold symmetry. In *E.coli*, the IGF  
298 loops of ClpX insert into hydrophobic clefts located at the surface of EcClpP<sup>15</sup>. Close  
299 inspection of the density map of the ClpP core complex in ClpP-S2c clearly revealed  
300 five extra densities in the hydrophobic clefts of the top ClpP ring (red and orange in  
301 Fig. 5D). Three of these densities were confidently identified as mobile loops  
302 stemming from Cpn11, contacting the ClpP5/R6 interface, and Cpn20-1C and  
303 Cpn20-2C, both contacting a ClpP5/P4 interface (red in Fig. 5E). The mobile loops  
304 from Cpn20-1N and Cpn20-2N might contact ClpP clefts as well, but at a slightly  
305 outward location, which could account for two more extra densities observed in clefts  
306 of the top ClpP ring (orange in Fig. 5D; Fig. S8D). An assignment of the densities in  
307 the two cleft regions was complicated by the close-by unassigned A2/A3 densities.  
308 For the two remaining hydrophobic clefts, in register with Cpn23, no extra map  
309 densities were observed (broken red lines in Fig. 5D), indicating that there is no direct  
310 interaction between Cpn23 and the ClpP core. In summary, the co-chaperonin appears  
311 to interact with the ClpP core by inserting at least three mobile loops into hydrophobic  
312 clefts on the surface of the top ring of ClpP (Fig. 5F), similar to the interaction of  
313 EcClpP with its AAA+ chaperone ClpX. Notice that the same loops of the  
314 co-chaperonin mediate its interaction with the Cpn60 chaperonin<sup>6</sup>. The interactions of  
315 the co-chaperonin with ClpP, the co-chaperonin with Cpn60, and ClpP with AAA+

316 chaperones are thus mutually exclusive.

317

## 318 **DISCUSSION**

### 319 **The chloroplast co-chaperonin has multiple functions**

320 Many lines of evidence indicate that Cpn20 functions as a co-chaperonin for Cpn60 to  
321 assist protein folding in chloroplasts<sup>38, 40-42</sup>. However, Cpn20 appears to exhibit  
322 functions independent of the Cpn60 chaperonin: in *Arabidopsis*, Cpn20 has been  
323 shown to play roles in abscisic acid (ABA) signaling and the activation of iron  
324 superoxide dismutase (FeSOD)<sup>7-9</sup>. Here we show that a fraction of the  
325 *Chlamydomonas* chloroplast Cpn11/20/23 co-chaperonin complex co-purified with  
326 the ClpP core complex, and this interaction was robust enough to withstand several  
327 chromatography purification steps (Fig. 1). This interaction was shown before in  
328 *Arabidopsis*<sup>21</sup>. The complexes between co-chaperonin and ClpP were confirmed by  
329 cryo-EM and *in vitro* reconstitution, and the co-chaperonin was shown to slow down  
330 the proteolytic activity of chloroplast ClpP (Figs. 2B and 5). The co-chaperonin caps  
331 the top-ring of the ClpP complex like a dome, similar to its interaction with Cpn60.  
332 Thus, the co-chaperonin might inhibit ClpP activity by blocking the entrance of  
333 unfolded proteins into the central cavity of the ClpP core complex via the pore of the  
334 top ring. The co-chaperonin complex interacts with ClpP and the Cpn60 chaperonin  
335 via the same mobile loops extending from the bottom of the dome (Fig. 5E).  
336 Therefore, the Cpn20/23/11 co-chaperonin complex appears to play a dual role in  
337 chloroplast protein quality control. Since its interaction with the Cpn60 chaperonin  
338 contributes to protein folding, the binding of the co-chaperonin to ClpP would  
339 simultaneously limit the efficiency of protein folding and inactivate a substantial part  
340 of the chloroplast's degradation capacity. Releasing the co-chaperonin from ClpP  
341 would activate both activities at the same time, which might be important upon rapid  
342 challenges of proteostasis by environmental changes. In future studies, it will be  
343 interesting to quantify the relative stoichiometry of the chaperonin, co-chaperonin,  
344 and ClpP complexes in the *Chlamydomonas* chloroplast and their interactions under

345 various growth or stress conditions. It is of note that the very abundant RbcL subunit  
346 of Rubisco is a substrate for both chaperonin and ClpP, and that translational  
347 attenuation of *clpP1* is lethal in the presence of *rbcL* mutations preventing its folding  
348 <sup>27</sup>. While we initially postulated that the lack of sufficient ClpP would cause  
349 poisoning of the chaperonin by an unfoldable substrate, we must now also consider an  
350 additional hypothesis, that the mutant RbcL, by increasing the residence time of the  
351 co-chaperonin on and ever-busy Cpn60, would deregulate ClpP proteolysis.

352 The fact that the three Cpn60 subunits were also detected by mass spectrometry  
353 in our preparation (Dataset 1) raises another possibility, namely that ClpP and Cpn60  
354 interact to regulate chloroplast protein homeostasis. Non-foldable substrate proteins,  
355 released from the chaperonin, need to be recognized by Clp to be degraded to prevent  
356 poisoning of the chaperonin. The co-chaperonin, by maintaining its interaction with  
357 the non-foldable substrate, could help direct it to the protease. In line with this idea, a  
358 cooperation between Trigger Factor, an ATP-independent ribosome-associated  
359 chaperone, and ClpXP was recently reported to promote the degradation of some  
360 substrates <sup>43</sup>.

### 361 **Molecular architecture of chloroplast ClpP**

362 The first structure of the *E. coli* ClpP core complex, obtained by X-ray  
363 crystallography, revealed 14 identical subunits in two stacked rings <sup>13</sup>. The ClpP  
364 structures solved afterwards all consisted of a single or two types of ClpP subunits. In  
365 contrast, the chloroplast ClpP core complex solved here combines 10 different  
366 subunits, either of the P-type (harboring a functional catalytic site) or R-type (lacking  
367 catalytic residues) or T-type (homologous to the N-domain of AAA+ chaperones),  
368 distributed with uneven stoichiometry between two rings of different subunit  
369 composition. The subunit composition of the two rings of plastid ClpP from  
370 *Arabidopsis* was reported previously by the van Wijk and Clarke groups <sup>20, 22, 30, 44, 45</sup>.  
371 The designated P-ring contains ClpP3, 4, 5 and 6 in a 1:2:3:1 ratio, while the  
372 designated R-ring consists of ClpP1 and ClpR1, 2, 3 and 4 in a 3:1:1:1:1 ratio. It was  
373 suggested that the two rings might exhibit different proteolytic capacities because

374 only three catalytic subunits are present in the R-ring compared to seven in the P-ring.  
375 In the *Chlamydomonas* ClpP core complex reported here, the top ring consists of three  
376 ClpP4, three ClpP5 and one ClpR6 subunits. Because algal ClpP4 forms a sister clade  
377 to land plant ClpP3/ClpP4, and ClpR6 is clearly derived from ClpP6 by loss of a  
378 catalytic residue <sup>32</sup>, the top ring of *Chlamydomonas* is clearly homologous to the  
379 *Arabidopsis* P-ring. Similarly, the bottom ring, with three ClpP1c and one each of  
380 ClpR1, 2, 3, and 4 subunits (Fig. 4C) can be called the R-ring. Because the diameter  
381 of the protein entrance pore in the P-ring is much larger than that in the R-ring (Fig.  
382 3A), we propose that the former is the functional entry site of substrates. Only the  
383 P-ring was observed to interact with the co-chaperonin (Fig. 5), in line with a central  
384 regulatory role for this interaction. Our structure supports the notion that substrates  
385 are degraded inside a unique central cavity by a variety of active sites, possibly  
386 showing distinct chemical specificities as in the proteasome <sup>46</sup>. Each subunit within  
387 each ring may also be functionally unique in terms of substrate selection, delivery and  
388 unfolding, and of interaction with the co-chaperonin. A good example is the specific  
389 interactions of the ClpP4/5 clefts with Cpn20 subunits (Fig. 5E, S8D).

390       Interesting differences can be noted between algal and land plant ClpP. With  
391 only 6 active subunits in its P-ring, the *Chlamydomonas* enzyme is slightly less  
392 asymmetrical than that of land plants in terms of catalysis (both have 3 catalytic sites  
393 in the R-ring). Importantly, the inactive ClpR6 subunit of the P-ring contributes,  
394 together with two other alga-specific features, namely the C-terminal extension of the  
395 R-ring ClpR3 and ClpT4, to the A1 side density that connects the two rings. In land  
396 plants, T-type Clp subunits were suggested to stabilize the ClpP core by interacting  
397 with both rings <sup>20, 21</sup>, and it will be interesting to see if they form a structure similar to  
398 the A1 side-mass. Note however that the *Chlamydomonas* ClpT3/4 are vastly different  
399 from the ClpT1/2 of land plants <sup>32</sup>, to the extent that they may not even be  
400 orthologous. Given that the N-terminal domain of AAA+ chaperones, to which ClpTs  
401 are homologous, play a role in substrate selection, the possibility arises that their dual  
402 structural/functional role was acquired several times in the evolution of the plastid Clp

403 system. Furthermore, the C-terminus of ClpR4 protrudes to the P-ring, which also  
404 might stabilize the ClpP core complex. The massive contacts between the two rings  
405 may explain the high stability of the ClpP core, exemplified by our observation that  
406 the two-rings could not be separated by high salt treatment, in contrast to its homologs  
407 in *E. coli* and *Arabidopsis* plastids<sup>45, 47</sup>.

#### 408 **Proteolytic activity of the ClpP core might be regulated by the tilted interaction** 409 **with the co-chaperonin complex**

410 Structures of several different AAA+ chaperones with their ClpP cores have emerged  
411 recently, providing detailed information on the six-seven symmetry mismatch  
412 between the two complexes, and how it impacts their interaction dynamics<sup>15, 16, 18</sup>.  
413 ClpX is tilted by 11° without major conformational changes upon binding to ClpP. As  
414 a result, the symmetry axes of the protease and the AAA+ chaperone are not aligned  
415 so that the translocation pathway for unfolded peptides is not straight but twisted. We  
416 also found a tilt of 4° between the axes of the co-chaperonin and the ClpP core (Fig.  
417 5C). However, the fact that a single type of particle was obtained, with specific  
418 interactions between co-chaperonin and Clp subunits, together with the absence of a  
419 symmetry mismatch, suggest that the two complexes do not rotate and that the  
420 co-chaperonin instead operates like a cap stably sealing the entrance to the ClpP core.

421 Because none of the three known chloroplast AAA+ chaperones (ClpC1, ClpD1,  
422 ClpB3) were co-purified with ClpP in this and previous studies, they might not  
423 cooperate with ClpP in the chloroplast as they do in bacteria and mitochondria. Since  
424 the purified ClpP core complex was able to degrade the model substrate casein *in*  
425 *vitro* with no need for addition of ADEP, it appears possible that chloroplast ClpP can  
426 degrade proteins *in vivo* without the assistance of any type of chaperone. Regulation  
427 of protease activity may be carried out by the co-chaperonin or by small-molecule  
428 activators acting like ADEP.

429

## 430 **EXPERIMENTAL PROCEDURES**

### 431 **Construction of expression plasmids for EcClpP and cochaperonins**

432 The *ClpP* gene sequence from *E. coli* was amplified by PCR on genomic DNA and  
433 cloned into the pHUE vector with restriction enzymes to generate *EcClp*-pHUE. The  
434 produced *EcClp* protein contains ubiquitin and a 6×His tag at its N-terminus that  
435 facilitated subsequent protein affinity purification. The forward and reverse primers  
436 were 5'-GCGGATCCATGTCATACAGCAGCGGCGAACG-3' and  
437 5'-CCCAAGCTTTCAATTACGATGGGTCAGAATCGAATCGACCAG-3'  
438 containing BamHI and HindIII restriction sites, respectively. The construction of the  
439 co-chaperonin expression plasmids, GroES-pET11a, CrCPN20-pQlinkT and  
440 CrCPN11/  
441 20/23-pQlinkT, were described earlier<sup>37</sup>.

#### 442 ***Chlamydomonas reinhardtii* strains and growth conditions**

443 *Chlamydomonas* strain ClpP1-strep (#8), used for the purification of the Clp complex  
444 via Strep-tag affinity purification, has been describe previously<sup>26</sup> and is freely  
445 available upon request. The strain was kept on solid TAP medium containing 100  
446 µg/ml of spectinomycin at 25°C under continuous illumination (40 µmol photo m<sup>-2</sup> s<sup>-1</sup>)  
447 or a photoperiod rhythm (12 h light/12 h dark).

#### 448 **Purification of the ClpP complex from *Chlamydomonas reinhardtii***

449 Purification of the ClpP complex from *Chlamydomonas reinhardtii* was conducted as  
450 described previously with some modifications<sup>48</sup>. The ClpP1-strep strain was  
451 inoculated into 24 L TAP liquid medium for 4 days under continuous light (40 µmol  
452 photo m<sup>-2</sup> s<sup>-1</sup>). When cell numbers reached around 6×10<sup>6</sup> cells/mL, the cells were  
453 collected by centrifugation at 3600 g for 6 min and resuspended in buffer A (20 mM  
454 Tris-HCl pH 8.0, 150 mM NaCl). The volume of the cell slurry was adjusted to 200  
455 ml by the addition of 1 mM EDTA, 1 mM PMSF, and two tablets of EDTA-free  
456 protease inhibitor cocktail (Roche). Unless otherwise stated, subsequent steps were  
457 performed at 4°C. The cells were sonicated and centrifuged at 36,000 g for 30 min to  
458 remove debris. 1 mg/L avidin and 6 mM MgCl<sub>2</sub> were added to the supernatant to  
459 improve the Strep tag binding efficiency with Strep-Tactin beads (Novagen). Next, the  
460 supernatant was further clarified by ultracentrifugation at 150,000 g for 1 h (Beckman



461 Coulter rotor, 70Ti). Ammonium sulfate was slowly added to the supernatant at 25%  
462 saturation. After gently stirring for 30 min, the produced aggregates were removed by  
463 centrifugation at 36000 g for 20 min. Buffer E (20 mM Tris-HCl pH 8.0, 1 mM DTT,  
464 10% glycerol) was added to the supernatant to dilute the ammonium sulfate  
465 concentration to 0.5 M and the solution was applied to pre-equilibrated hydrophobic  
466 column after passing through a 0.22  $\mu$ m filter (Hitrap phenyl, GE Healthcare).  
467 Proteins were eluted by an ammonium sulfate gradient from 0.5 M to 0 M with ten  
468 column volumes. Clp-containing fractions were collected after visualization with  
469 SDS-PAGE and transferred to a Strep-Tactin gravity column which was  
470 pre-equilibrated with buffer B (20 mM Tris-HCl pH 8.0, 100 mM NaCl, 1 mM DTT).  
471 The protein was eluted with buffer C (buffer B+10% glycerol+2.5 mM Desthiobiotin  
472 (Novagen)) in four column volumes. The ClpP complex was concentrated and  
473 subjected to a Superdex-200 column pre-equilibrated with buffer D (20 mM Tris-HCl  
474 pH 8.0, 80 mM NaCl, 10% glycerol) and the desired fractions were collected. Purified  
475 ClpP complexes were concentrated to ~2 mg/ml by Amicon Ultra-15 Centrifugal  
476 Filter Units (Merck Millipore, Beijing China) with 100 kDa cut-off, supplemented  
477 with 10% glycerol and frozen at -80°C.

#### 478 **Purification of recombinantly expressed proteins**

479 **EcClpP** The *EcClp*-pHUE plasmid was transformed into the *E. coli* BL21 (DE3)  
480 strain, and then transferred to 4 L lysogeny broth (LB) medium containing 100  $\mu$ g/L  
481 ampicillin. When *E. coli* was grown to an OD 600 of ~ 0.6, 1 mM isopropyl  
482  $\beta$ -D-1-thiogalactopyranoside (IPTG) was added to induce protein expression. After 4  
483 hours, cells were collected by centrifugation at 4000 g. Unless otherwise stated, all  
484 purification steps were performed at 4°C. Cells were resuspended in lysis buffer (20  
485 mM Tris-HCl, pH 8.0, 300 mM NaCl, 1 mM DTT, 10 mM imidazole, 1 mM  
486 phenylmethylsulfonyl fluoride (PMSF)) and lysed by sonication. Debris was removed  
487 by centrifugation at 36000 g for 40 min and the supernatant was passed through a 0.22  
488  $\mu$ m filter followed by transferring into the Ni-NTA gravity column. Protein was  
489 eluted with elution buffer (20 mM Tris-HCl, pH 8.0, 300 mM NaCl, 1 mM DTT, 250

490 mM imidazole) after two washes with buffer (20 mM Tris-HCl, pH 8.0, 300 mM  
491 NaCl, 1 mM DTT, 25 mM imidazole). Proteins in the eluted fractions were collected  
492 and digested with deubiquitinating enzyme USP2cc (1:50 molar ratio) to remove the  
493 ubiquitin-6×His tag. The digested solution was applied to Ni-NTA column again and  
494 the flow through was collected which contained EcClpP protein without tag. The  
495 collected protein was concentrated using Amicon Ultra-15 Centrifugal Filter Units  
496 (Merck Millipore, Beijing China) with 100 kDa cut off and frozen at -80 °C.

497 **GroES, Cpn20 and Cpn11/20/23.** All co-chaperonins were purified using the same  
498 method. Individual expression plasmid GroES-pET11a, Cpn20-pQlinkT or  
499 Cpn11/20/23-pQlinkT was transformed into *E. coli* strain BL21 (DE3). Transformants  
500 were picked and transferred to 6 L of LB medium containing 100 µg/L ampicillin.  
501 When cells were grown to an OD 600 of ~ 0.6, 1 mM IPTG was added to induce  
502 protein expression at 37 °C for 4 hours. Cells were harvested by centrifugation at 3600  
503 g for 6 min. Unless otherwise stated, all subsequent steps were performed at 4 °C. Cell  
504 pellets were resuspended in lysis buffer (30 mM Tris-HCl, pH 8.0, 60 mM NaCl, 1  
505 mM DTT, 1 mM EDTA and 1 mM PMSF) sonicated. Lysates were centrifuged at  
506 36,000 g for 30 min to remove cell debris. The supernatant was passed through a 0.22  
507 µm filter followed by transfer to a pre-equilibrated source 30Q column (GE  
508 Healthcare) with 1 ml/min flow rate. Co-chaperonins were eluted by a linear salt  
509 gradient from 30 mM to 1 M NaCl with 10-fold column volume. Fractions containing  
510 protein according to UV absorption were separated by 15% SDS-PAGE and  
511 visualized by Coomassie staining. Eluted proteins were concentrated, then injected  
512 into a pre-equilibrated Superdex75 column (GE Healthcare) with a flow rate of 0.8  
513 ml/min. According to UV absorption, the protein fraction was further analyzed with  
514 15% SDS-PAGE and Coomassie staining. The pure co-chaperonin proteins were  
515 concentrated with Amicon Ultra-15 Centrifugal filters with 30 kDa cutoff, then  
516 flash-frozen in liquid nitrogen and stored at -80 °C.

#### 517 **Identification of CrClpP subunits by mass spectrometry**

518 The protein subunits of the CrClpP complex were separated on an SDS-PAGE gel and

519 visualized by Coomassie staining. Individual bands were cut out and digested by  
520 trypsin. Liquid chromatography-mass spectrometry (LC-MS) was done on a Thermo  
521 Scientific Q Exactive (QE) mass spectrometer at the Beijing Huada Protein R&D  
522 Center Co., Ltd. (Beijing, P.R.China). The Q Exactive mass spectrometry data were  
523 searched against the Phytozome v12.1(*Chlamydomonas reinhardtii*) database and  
524 NCBI-*Chlamydomonas* (taxid: 3052) database using 15 ppm peptide mass tolerance  
525 and 20 m/z fragment mass tolerance.

#### 526 **Immunoprecipitation assays**

527 Protein A-sepharose beads coupled with CrCpn20 or strep-tag antibodies were  
528 pre-equilibrated in lysis buffer containing 20 mM Hepes-KOH (pH7.5), 150 mM  
529 NaCl, 10 mM MgCl<sub>2</sub>, 20 mM KCl and 2 mM EDTA, then incubated with total protein  
530 or stroma protein which was prepared with the same lysis buffer under gentle stirring  
531 at 4°C. Protein A beads were washed three times with lysis buffer containing 0.1%  
532 Tween 20. Bound protein complexes were eluted with 2% SDS for 1 h at 4°C. The  
533 eluted proteins were separated by 12% SDS-PAGE and analyzed by immunoblotting.

#### 534 **Analytical gel filtration**

535 The ClpP interaction with co-chaperonins was analyzed by analytical gel filtration as  
536 described previously with some modifications<sup>38</sup>. 1 μM ClpP and 2 μM co-chaperonin  
537 were incubated for 30 min at 4°C in 20 mM MOPS-KOH, pH 7.5, 80 mM NaCl, 10  
538 mM MgCl<sub>2</sub>, 10 mM KCl, 1 mM DTT, 10% glycerol. Then the protein complexes  
539 were loaded onto a Superdex 200 PC 3.2/10 column (GE Healthcare) at a flow rate of  
540 0.05 ml/min. 50 μL fractions were collected and analyzed by immunoblotting with  
541 Strep-tag and Cpn20 antibodies.

#### 542 **Asymmetric flow field-flow fractionation with multi-angle light scattering** 543 **(AFFFFF-MALS)**

544 50 μg protein of purified CrClpP were loaded into a AFFFFF-MALS device with a flow  
545 rate of 0.8 ml/min and a cross-flow rate of 2 ml/min using a 350 mm spacer and 10  
546 kDa RC membrane (Wyatt Technology, Santa Barbara, CA, USA). The monitor  
547 methods employed a multiple-angle light scattering detector (DAWN HELEOS II,

548 658 nm; Wyatt Technology), a UV detector (1100 series, 280 nm; Agilent  
549 Technologies In., Santa Clara, CA, USA) and a differential refractive index detector  
550 (Optilab rEX, 658 nm; Wyatt Technology)<sup>49</sup>. The CrClpP molecular weight was  
551 calculated in the presence of Dn/dc values equal to 0.185 ml/g.

### 552 **β-casein degradation assays**

553 Degradation of the substrate protein β-casein was visualized by Coomassie Blue R  
554 staining after separating proteins via SDS-PAGE (12% acrylamide). The reaction  
555 mixture contained 20 mM Tris-HCl pH 8.0, 120 mM NaCl, 10 mM KCl, 10 mM  
556 MgCl<sub>2</sub>, 1 mM DTT, 10% glycerol, 0.4 μM EcClpP or CrClpP, 0.4 μM β-casein protein  
557 with or without 0.4 μM co-chaperonin (GroES, Cpn20 and Cpn11/20/23). 4 to 18 μM  
558 protease activator ADEP (#sc-397312, Santa Cruz) dissolved in DMSO was added to  
559 the reaction as indicated. The reaction was performed at 30°C, and the aliquots were  
560 taken at the indicated time points. The reaction was stopped by heating to 98°C for 10  
561 min. Each reaction was performed at least three times and densitometric  
562 quantification of β-casein from the reactions was made with Photoshop CS6.

### 563 **Cryo-EM sample preparation and data collection**

564 Holey carbon grids (Quantifoil R2/1, 200 mesh) were plasma cleaned using a Solarus  
565 plasma cleaner (Gatan), and an aliquote of 2 μl CrClpP sample was placed onto the  
566 glow-discharged grid. Then the grid was flash-frozen in liquid ethane by a Vitrobot  
567 Mark IV (Thermo Fisher Scientific). Movies were taken on a Titan Krios transmission  
568 electron microscope (Thermo Fisher Scientific) equipped with a Cs corrector and  
569 operated at an accelerating voltage of 300 kV with a nominal magnification of  
570 18,000x (Table S3). Movies were collected by using a K2 Summit direct electron  
571 detector (Gatan) in super-resolution mode (yielding a pixel size of 1.318 Å after 2  
572 times binning). Each movie was dose-fractioned into 38 frames and the exposure time  
573 was 7.6 s with 0.2 s for each frame, producing a total dose of ~38 e<sup>-</sup>/Å<sup>2</sup>. The defocus  
574 value of the data set varied from -0.8 to -2.5 μm. We employed the SerialEM  
575 automated data collection software package to collect the images<sup>50</sup>.

### 576 **Image processing and 3D reconstruction**

577 A total of 8,064 movies were applied for CrClpP structure determination. Unless  
578 otherwise specified, single-particle analysis was mainly executed in RELION 3.1<sup>51, 52</sup>.  
579 All images were aligned and summed using MotionCorr2<sup>53</sup> and CTF parameters were  
580 determined using CTFFIND4<sup>51, 52</sup>. We obtained 1,351,977 particles by automatic  
581 particle picking followed by manual checking, and 578,978 particles remained for  
582 further processing after reference-free 2D classification. Through one round of 3D  
583 classification, a ClpP-S1 dataset of 306,743 particles and a CrClpP-S2 dataset of  
584 134,904 particles were obtained. Then multiple rounds of reference free 2D and 3D  
585 classification were applied to clean up the particles for each dataset. Classes with  
586 better structural features were combined and yielded ClpP-S1 dataset consisting  
587 131,245 particles. After further Bayesian polishing and CTF refinement, a map at 3.3  
588 Å resolution was obtained. Two classes with better structural features were combined  
589 and yielded ClpP-S2 dataset consisting 49,759 particles. After Bayesian polishing and  
590 CTF refinement, a ClpP-S2 map at 3.6 Å resolution was obtained. To improve the  
591 local resolution of the Cpn cap in the ClpP2-S2 map, the particles were subtracted by  
592 a soft mask focusing on the cap region and re-centered. We then applied 3D  
593 classification and obtained a cleaned-up dataset of 13,040 particles with better  
594 structural features especially more complete density of the Cpn mobile loops, which  
595 was further refined to 4.8 Å resolution of the Cpn11/20/23 map. ClpP-S2 map was  
596 then combined with the Cpn11/20/23 map together by using the *vopmaximum*  
597 function in Chimera<sup>54</sup>, generating the composite ClpP-S2 map (termed ClpP-S2c).  
598 The overall resolution was determined based on the gold-standard criterion using an  
599 FSC of 0.143. The local resolution estimation was determined by Local resolution  
600 function in RELION 3.1.

#### 601 **Model building of Clp subunits with the co-chaperonin**

602 The structures of conserved regions of Clp subunits were predicted using the Rosetta  
603 server<sup>55, 56</sup>. The predicted structures of conserved domains were docked rigidly into  
604 the density map in UCSF Chimera. The coordinates were further refined by the Real  
605 Space Refine module of the Phenix suite<sup>57</sup>. On this basis of refinement, the Rosetta

606 enumerative sampling method was applied to build the remaining residues of each Clp  
607 subunit *de novo*<sup>56, 58, 59</sup>. The resulting model was adjusted manually in Coot<sup>60</sup>. About  
608 the co-chaperonin Cpn11/20/23 model, each Cpn11, Cpn20, Cpn23 homology model  
609 was built with the tFold server (Tencent AI Lab) or Rosetta server. These models  
610 were docked into the cryo-EM map of ClpP-S2c using the fit in map command in  
611 UCSF Chimera<sup>54</sup>. The resulting model was subjected to Rosetta and Phenix  
612 refinement<sup>57, 56</sup>. The geometries and atomic model refinement statistics were  
613 evaluated by Molprobity in Phenix<sup>61</sup>.

614 Cryo-EM data acquisition, 3D process information and model refinement  
615 statistics are summarized in Table S3. Figures were generated with either UCSF  
616 Chimera and ChimeraX<sup>54, 62</sup>.

617

#### 618 **Accession codes**

619 Electron density maps have been deposited in the Electron Microscopy Data Bank  
620 under accession codes EMD-31171 for CrClpP-S1, EMD-31175 for ClpP-S2,  
621 EMD-31173 for ClpP-S2c and EMD-31174 for Cpn11/20/23. Related atom  
622 coordinates file also has been submitted to the Protein Data Bank, with accession  
623 codes 7EKO for CrClpP-S1, and 7EKQ for CrClpP-S2c.

#### 624 **Acknowledgments**

625 We are grateful to the staff of the NCPSS EM facility, Mass Spectrometry facility,  
626 and Database and Computing facility for instrument support and technical assistance.  
627 This work was funded by the Strategic Priority Research Program of Chinese  
628 Academy of Sciences (Grant No. XDA24020103-2, XDB37040103), the National  
629 Key Research and Development Program of China (2016YFD0100405,  
630 2017YFA0503503) and the Ministry of Agriculture of China  
631 (2016ZX08009-003-005), the ‘Initiative d’Excellence’ program from the French State  
632 (Grant ‘DYNAMO’, ANR-11-LABX-0011-01), and the DFG (TRR 175, project C02).  
633 We thank Prof. Jean David Rochaix and Dr. Silvia Ramundo for their fruitful  
634 discussion.

635 **Author Contribution**

636 C. L. and Y.C. supervised the project. N. W. executed all biochemical experiments. Y.  
637 W. and X. Z. collected the cryo-EM data. Y. W. did data processing with initial map  
638 from X. Z. Y.W. and N.W. did model building and structural analysis. Q. Z. started the  
639 project and optimized the protein purification. C. P. performed the MS analysis. W. Z.  
640 and Y. L. helped to purify protein. O. V. and M. S. were involved in the project design,  
641 data analysis and interpretation. C. L., N. W., O. V. and M. S. wrote the manuscript  
642 with modification from Y. W. and Y. C.

643 **Information**

644 The manuscript contains five figures. The supplementary data including eight Figures  
645 and three Tables can be found enclosed with this article.

646

647 **REFERENCES**

- 648 1. Cyr, D.M., Hohfeld, J. & Patterson, C. Protein quality control: U-box-containing E3  
649 ubiquitin ligases join the fold. *Trends Biochem Sci* **27**, 368-375 (2002).
- 650 2. Bukau, B., Weissman, J. & Horwich, A. Molecular chaperones and protein quality  
651 control. *Cell* **125**, 443-451 (2006).
- 652 3. Janska, H., Kwasniak, M. & Szczepanowska, J. Protein quality control in  
653 organelles—AAA/FtsH story. *Biochimica Et Biophysica Acta (BBA)-Molecular Cell*  
654 *Research* **1833**, 381-387 (2013).
- 655 4. Baker, B.M. & Haynes, C.M. Mitochondrial protein quality control during biogenesis  
656 and aging. *Trends Biochem Sci* **36**, 254-261 (2011).
- 657 5. Sontag, E.M., Samant, R.S. & Frydman, J. Mechanisms and Functions of Spatial  
658 Protein Quality Control. *Annu Rev Biochem* **86**, 97-122 (2017).

- 659 6. Hayer-Hartl, M., Bracher, A. & Hartl, F.U. The GroEL-GroES Chaperonin Machine: A  
660 Nano-Cage for Protein Folding. *Trends Biochem Sci* **41**, 62-76 (2016).
- 661 7. Kuo, W. et al. CHAPERONIN 20 mediates iron superoxide dismutase (Fe SOD)  
662 activity independent of its co-chaperonin role in Arabidopsis chloroplasts. *New*  
663 *Phytologist* **197**, 99-110 (2013).
- 664 8. Zhang, X. et al. Arabidopsis co-chaperonin CPN20 antagonizes Mg-chelatase H  
665 subunit to derepress ABA-responsive WRKY40 transcription repressor. *Science China*  
666 *Life Sciences* **57**, 11-21 (2014).
- 667 9. Zhang, X.-F. et al. Cochaperonin CPN20 negatively regulates abscisic acid signaling  
668 in Arabidopsis. *Plant molecular biology* **83**, 205-218 (2013).
- 669 10. Rawlings, N.D. et al. The MEROPS database of proteolytic enzymes, their substrates  
670 and inhibitors in 2017 and a comparison with peptidases in the PANTHER database.  
671 *Nucleic Acids Research* **46**, D624-D632 (2017).
- 672 11. Nishimura, K., Kato, Y. & Sakamoto, W. Chloroplast Proteases: Updates on  
673 Proteolysis within and across Suborganellar Compartments. *Plant Physiol* **171**,  
674 2280-2293 (2016).
- 675 12. Gottesman, S. proteases and their targets in escherichia coli. *Annual Review of*  
676 *Genetics* **30**, 465-506 (1996).
- 677 13. Wang, J., Hartling, J.A. & Flanagan, J.M. The structure of ClpP at 2.3 Å resolution  
678 suggests a model for ATP-dependent proteolysis. *Cell* **91**, 447-456 (1997).
- 679 14. Sauer, R.T. & Baker, T.A. AAA+ proteases: ATP-fueled machines of protein  
680 destruction. *Annu Rev Biochem* **80**, 587-612 (2011).



- 681 15. Ripstein, Z.A., Vahidi, S., Houry, W.A., Rubinstein, J.L. & Kay, L.E. A processive  
682 rotary mechanism couples substrate unfolding and proteolysis in the ClpXP  
683 degradation machinery. *Elife* **9**, e52158 (2020).
- 684 16. Lopez, K.E. et al. Conformational plasticity of the ClpAP AAA+ protease couples  
685 protein unfolding and proteolysis. *Nature Structural & Molecular Biology*, 1-11 (2020).
- 686 17. Fei, X. et al. Structures of the ATP-fueled ClpXP proteolytic machine bound to protein  
687 substrate. *Elife* **9** (2020).
- 688 18. Gatsogiannis, C., Balogh, D., Merino, F., Sieber, S.A. & Raunser, S. Cryo-EM  
689 structure of the ClpXP protein degradation machinery. *Nature structural & molecular*  
690 *biology* **26**, 946-954 (2019).
- 691 19. de Sagarra, M.R. et al. Mitochondrial localization and oligomeric structure of HClpP,  
692 the human homologue of E. coli ClpP. *J Mol Biol* **292**, 819-825 (1999).
- 693 20. Kim, J. et al. Structures, Functions, and Interactions of ClpT1 and ClpT2 in the Clp  
694 Protease System of Arabidopsis Chloroplasts. *Plant Cell* **27**, 1477-1496 (2015).
- 695 21. Sjögren, L.L. & Clarke, A.K. Assembly of the chloroplast ATP-dependent Clp protease  
696 in Arabidopsis is regulated by the ClpT accessory proteins. *The Plant Cell* **23**, 322-332  
697 (2011).
- 698 22. Olinares, P.D., Kim, J., Davis, J.I. & van Wijk, K.J. Subunit stoichiometry, evolution,  
699 and functional implications of an asymmetric plant plastid ClpP/R protease complex in  
700 Arabidopsis. *Plant Cell* **23**, 2348-2361 (2011).
- 701 23. Stanne, T.M., Pojidaeva, E., Andersson, F.I. & Clarke, A.K. Distinctive types of  
702 ATP-dependent Clp proteases in cyanobacteria. *J Biol Chem* **282**, 14394-14402

- 703 (2007).
- 704 24. Majeran, W., Friso, G., van Wijk, K.J. & Vallon, O. The chloroplast ClpP complex in  
705 *Chlamydomonas reinhardtii* contains an unusual high molecular mass subunit with a  
706 large apical domain. *The FEBS journal* **272**, 5558-5571 (2005).
- 707 25. Schroda, M. & Vallon, O. in *The Chlamydomonas Sourcebook (Second Edition)*. (eds.  
708 E.H. Harris, D.B. Stern & G.B. Witman) 671-729 (Academic Press, London, 2009).
- 709 26. Derrien, B., Majeran, W., Wollman, F.-A. & Vallon, O. Multistep processing of an  
710 insertion sequence in an essential subunit of the chloroplast ClpP complex. *Journal of*  
711 *Biological Chemistry* **284**, 15408-15415 (2009).
- 712 27. Majeran, W., Wostrickoff, K., Wollman, F.A. & Vallon, O. Role of ClpP in the Biogenesis  
713 and Degradation of RuBisCO and ATP Synthase in *Chlamydomonas reinhardtii*.  
714 *Plants (Basel)* **8** (2019).
- 715 28. Ramundo, S. et al. Conditional Depletion of the *Chlamydomonas* Chloroplast ClpP  
716 Protease Activates Nuclear Genes Involved in Autophagy and Plastid Protein Quality  
717 Control. *Plant Cell* **26**, 2201-2222 (2014).
- 718 29. Sjogren, L.L., Stanne, T.M., Zheng, B., Sutinen, S. & Clarke, A.K. Structural and  
719 functional insights into the chloroplast ATP-dependent Clp protease in *Arabidopsis*.  
720 *Plant Cell* **18**, 2635-2649 (2006).
- 721 30. Kim, J. et al. Subunits of the plastid ClpPR protease complex have differential  
722 contributions to embryogenesis, plastid biogenesis, and plant development in  
723 *Arabidopsis*. *Plant Cell* **21**, 1669-1692 (2009).
- 724 31. Vahidi, S. et al. An allosteric switch regulates *Mycobacterium tuberculosis* ClpP1P2

- 725 protease function as established by cryo-EM and methyl-TROSY NMR. *Proceedings*  
726 *of the National Academy of Sciences* **117**, 5895-5906 (2020).
- 727 32. Derrien, B. et al. The purification of the *Chlamydomonas reinhardtii* chloroplast ClpP  
728 complex: additional subunits and structural features. *Plant molecular biology* **80**,  
729 189-202 (2012).
- 730 33. LaBreck, C.J., May, S., Viola, M.G., Conti, J. & Camberg, J.L. The Protein Chaperone  
731 ClpX Targets Native and Non-native Aggregated Substrates for Remodeling,  
732 Disassembly, and Degradation with ClpP. *Front Mol Biosci* **4**, 26 (2017).
- 733 34. Gersch, M. et al. AAA+ chaperones and acyldepsipeptides activate the ClpP protease  
734 via conformational control. *Nat Commun* **6**, 6320 (2015).
- 735 35. Sass, P. et al. Antibiotic acyldepsipeptides activate ClpP peptidase to degrade the cell  
736 division protein FtsZ. *Proceedings of the National Academy of Sciences* **108**,  
737 17474-17479 (2011).
- 738 36. Kirstein, J. et al. The antibiotic ADEP reprogrammes ClpP, switching it from a  
739 regulated to an uncontrolled protease. *EMBO molecular medicine* **1**, 37-49 (2009).
- 740 37. Zhao, Q. et al. Hetero-oligomeric CPN60 resembles highly symmetric group-I  
741 chaperonin structure revealed by Cryo-EM. *The Plant journal : for cell and molecular*  
742 *biology* **98**, 798-812 (2019).
- 743 38. Tsai, Y.-C.C., Mueller-Cajar, O., Saschenbrecker, S., Hartl, F.U. & Hayer-Hartl, M.  
744 Chaperonin cofactors, Cpn10 and Cpn20, of green algae and plants function as  
745 hetero-oligomeric ring complexes. *Journal of Biological Chemistry* **287**, 20471-20481  
746 (2012).

- 747 39. Schroda, M. The Chlamydomonas genome reveals its secrets: chaperone genes and  
748 the potential roles of their gene products in the chloroplast. *Photosynthesis research*  
749 **82**, 221-240 (2004).
- 750 40. Bracher, A., Whitney, S.M., Hartl, F.U. & Hayer-Hartl, M. Biogenesis and Metabolic  
751 Maintenance of Rubisco. *Annu Rev Plant Biol* **68**, 29-60 (2017).
- 752 41. Weiss, C., Bonshtien, A., Farchi-Pisanty, O., Vitlin, A. & Azem, A. Cpn20: siamese  
753 twins of the chaperonin world. *Plant molecular biology* **69**, 227 (2009).
- 754 42. Koumoto, Y., Shimada, T., Kondo, M., Hara-Nishimura, I. & Nishimura, M.  
755 Chloroplasts have a novel Cpn10 in addition to Cpn20 as co-chaperonins in  
756 *Arabidopsis thaliana*. *Journal of Biological Chemistry* **276**, 29688-29694 (2001).
- 757 43. Rizzolo, K. et al. Functional cooperativity between the trigger factor chaperone and the  
758 ClpXP proteolytic complex. *Nature communications* **12**, 1-18 (2021).
- 759 44. Kim, J. et al. Modified Clp protease complex in the ClpP3 null mutant and  
760 consequences for chloroplast development and function in *Arabidopsis*. *Plant Physiol*  
761 **162**, 157-179 (2013).
- 762 45. Olinares, P.D., Kim, J. & van Wijk, K.J. The Clp protease system; a central component  
763 of the chloroplast protease network. *Biochim Biophys Acta* **1807**, 999-1011 (2011).
- 764 46. Gallastegui, N. & Groll, M. The 26S proteasome: assembly and function of a  
765 destructive machine. *Trends Biochem Sci* **35**, 634-642 (2010).
- 766 47. Maurizi, M.R., Thompson, M.W., Singh, S.K. & Kim, S.-H. in *Methods in enzymology*,  
767 Vol. 244 314-331 (Elsevier, 1994).
- 768 48. Derrien, B. & Vallon, O. One-step Affinity Purification of the Chloroplast ClpP Complex

- 769 from the Green Alga *Chlamydomonas reinhardtii* Using the Strep-tagII Epitope Tag.  
770 *Bio-protocol* **3**, e315 (2013).
- 771 49. Bai, C. et al. Protomer Roles in Chloroplast Chaperonin Assembly and Function. *Mol*  
772 *Plant* **8**, 1478-1492 (2015).
- 773 50. Mastronarde, D.N. Automated electron microscope tomography using robust  
774 prediction of specimen movements. *Journal of Structural Biology* **152**, 36-51 (2005).
- 775 51. Rohou, A. & Grigorieff, N. CTFFIND4: Fast and accurate defocus estimation from  
776 electron micrographs. *Journal of structural biology* **192**, 216-221 (2015).
- 777 52. Scheres, S.H. RELION: implementation of a Bayesian approach to cryo-EM structure  
778 determination. *Journal of structural biology* **180**, 519-530 (2012).
- 779 53. Zheng, S.Q. et al. MotionCor2: anisotropic correction of beam-induced motion for  
780 improved cryo-electron microscopy. *Nature methods* **14**, 331-332 (2017).
- 781 54. Pettersen, E.F. et al. UCSF Chimera--a visualization system for exploratory research  
782 and analysis. *J Comput Chem* **25**, 1605-1612 (2004).
- 783 55. Raman, S. et al. Structure prediction for CASP8 with all-atom refinement using  
784 Rosetta. *Proteins* **77 Suppl 9**, 89-99 (2009).
- 785 56. Song, Y. et al. High-resolution comparative modeling with RosettaCM. *Structure* **21**,  
786 1735-1742 (2013).
- 787 57. Adams, P.D. et al. PHENIX: a comprehensive Python-based system for  
788 macromolecular structure solution. *Acta Crystallogr D Biol Crystallogr* **66**, 213-221  
789 (2010).
- 790 58. Frenz, B., Walls, A.C., Egelman, E.H., Veesler, D. & DiMaio, F. RosettaES: a sampling

- 791 strategy enabling automated interpretation of difficult cryo-EM maps. *Nature methods*
- 792 **14**, 797-800 (2017).
- 793 59. Wang, R.Y.-R. et al. De novo protein structure determination from
- 794 near-atomic-resolution cryo-EM maps. *Nature methods* **12**, 335-338 (2015).
- 795 60. Emsley, P., Lohkamp, B., Scott, W.G. & Cowtan, K. Features and development of
- 796 Coot. *Acta crystallographica. Section D, Biological crystallography* **66**, 486-501
- 797 (2010).
- 798 61. Williams, C.J. et al. MolProbity: More and better reference data for improved all-atom
- 799 structure validation. *Protein Sci* **27**, 293-315 (2018).
- 800 62. DeLano, W.L. Pymol: An open-source molecular graphics tool. *CCP4 Newsletter On*
- 801 *Protein Crystallography* **40**, 82-92 (2002).

802

### 803 **FIGURE LEGENDS**

#### 804 **Figure 1. Co-chaperonins interact with CrClpP**

805 (A) Purified *Chlamydomonas* ClpP complexes were separated on 12-18%

806 SDS-polyacrylamide gels and visualized by Coomassie staining. Proteins in visible

807 bands were identified by mass spectrometry and the bands identified as Clp or

808 co-chaperonin subunits are marked.

809 (B) Purified ClpP and Cpn60 complexes were analyzed on a 5% non-denaturing (ND)

810 polyacrylamide gel and visualized with Coomassie staining. The arrowhead indicates

811 the position of the oligomeric 820-kDa Cpn60 complex and the asterisk the position

812 of the 60-kDa Cpn60 monomer.

813 (C) Immunoblots analysis. Purified ClpP complexes were separated on a 15%

814 SDS-polyacrylamide gel, transferred to nitrocellulose and immunodecorated with

815 anti-strep and anti-Cpn20 antibodies. The Strep-antibody recognized the three gene

816 products of the plastid-encoded *clpP* gene, ClpP<sub>1H</sub>, ClpP<sub>1C</sub> and ClpP<sub>1C'</sub>.

817 (D) Immunoprecipitation of Cpn20. Total cell lysates from the ClpP-Strep (#8) strain

818 (input) were incubated with protein A-Sepharose beads coupled to antibodies of either

819 preimmune serum (pre) or anti-Cpn20 serum. Precipitated proteins were analyzed by

820 immunoblotting using antisera against ClpP4, the Strep-tag (detecting ClpP<sub>1C</sub>), ClpR6,

821 ClpT4 and Cpn60.

822 (E) Co-migration of ClpP core complexes and co-chaperonins in size exclusion

823 chromatography. 1  $\mu$ M ClpP protein complex was injected into a Superdex 200 PC  
824 3.2/10 column after incubation with or without 2  $\mu$ M co-chaperonin for 30 min at 4 $\square$ .  
825 Proteins were eluted with 20 mM MOPS-KOH, pH 7.5, 80 mM NaCl, 10 mM MgCl<sub>2</sub>,  
826 10 mM KCl, 1 mM DTT, 10% glycerol. Then the corresponding fractions were  
827 analyzed by SDS-PAGE and immunoblotting using antisera against Cpn20 or GroES.  
828 The positions of the ClpP and co-chaperonin complexes are indicated at the top of the  
829 panel.

830

### 831 **Figure 2. Co-chaperonins inhibit ClpP proteolytic activity**

832 (A) and (C) Degradation of  $\beta$ -casein was monitored in reactions containing  $\beta$ -casein  
833 (16  $\mu$ M), CrClpP (0.4  $\mu$ M), EcClpP (0.4  $\mu$ M), Cpn20 (0.4  $\mu$ M), Cpn11/20/23 (0.4  $\mu$ M)  
834 and ADEP dissolved in DMSO (4 or 18  $\mu$ M) as indicated. Reactions were performed  
835 at 30 $\square$ , aliquots were taken at the indicated time points, and analyzed via SDS-PAGE  
836 (15% gels) and Coomassie staining. Arrowheads indicate the position of  $\beta$ -casein,  
837 stars indicate the position of the EcClpP protein and arrows indicate the position of  
838 Cpn20.

839 (B) and (D) Densitometric quantification of  $\beta$ -casein from the reactions shown in (A)  
840 and (C), respectively. Shown are mean values from three independent replicates, error  
841 bars represent SD. Quantifications were made with Photoshop CS6.

842

### 843 **Figure 3. Cryo-EM structure of the *Chlamydomonas* ClpP complex**

844 (A) Overview of ClpP-S1 particles. The dimensions are given next to the particles.  
845 The cut-away views of the central pore in the two rings of the ClpP core complex are  
846 shown.

847 (B) Overview of ClpP-S2<sub>C</sub> particles. The dimensions are given next to the particles.

848 (C) Superimposition of EcClpP (PDB ID:1TYF) with density maps of CrClpP-S1.  
849 The subunits located in the top ring of EcClpP are shown in light or dark green and  
850 the subunits of the bottom ring are shown in yellow or orange. The dotted line  
851 indicates the interface between the two rings. Additional densities of CrClpP not  
852 overlapping with EcClp are shown in gray. The most prominent ones are labeled A1,  
853 A2 and A3.

854

### 855 **Figure 4. Properties of the *Chlamydomonas* ClpP core complex**

856 (A) Cartoon presentation of the CrClp core complex. The subunits designated as  
857 D1-D14 are shown in the left grey cartoon and the corresponding assigned subunits  
858 are colored at the right. Subunit ClpP1<sub>C</sub> occupies positions D8, D10, D13 positions.  
859 Subunit ClpP4 occupies positions D3, D5 and D7. Subunit ClpP5 occupies positions  
860 D2, D4 and D6. Subunits ClpR1, R2, R3, R4 and R6 occupy single positions at D9,  
861 D12, D14, D11 and D1 positions, respectively.

862 (B) Density map of the ClpP core complex. Densities with assigned Clp subunits are  
863 shown in colors, densities that could not be assigned are shown in white.

864 (C) Subunit composition and arrangement in the top and bottom rings of the ClpP  
865 core complex.

866 (D) Assignment of Clp subunits to the additional density map A1. This region is

867 composed of full-length ClpT4 (cyan), the long C-terminus of ClpR3 (pink), and  
868 several amino acids from the C-terminus of ClpR6 (purple). The zoom-in view shows  
869 the fitting of these three subunits to the density.

870 **(E)** Position of the ClpR4 subunit (turquoise ) in the bottom ring of the ClpP core  
871 complex. The long C-terminus of ClpR4 protrudes to a region next to the top ring.  
872 The fitting of ClpR4 is shown in the zoom-in view.

873 **(F)** Electrostatic potential of the ClpP core complex. Acidic amino acids are shown in  
874 red, basic amino acids in blue.

875 **(G)** Hydrophobicity of amino acids at the ClpP core surface. Hydrophobic amino  
876 acids are shown in red, hydrophilic amino acids are shown in light blue. The seven  
877 hydrophobic binding clefts observed in the top ring of Clp-S1 are encircled by black  
878 broken lines.

879

880 **Figure 5. Cryo-EM structure of the *Chlamydomonas* ClpP-Cpn11/20/23 complex**

881 **(A)** Sequence alignment of Cpn11, Cpn20-N, Cpn20-C, Cpn23-N, Cpn23-C and  
882 GroES. N and C indicate N- and C-terminal GroES-like domains of Cpn20 and Cpn23.  
883 The sequence regions of mobile loop and roof are indicated with green boxes.

884 **(B)** Superimposition of the Cpn11/20/23 model and the cryo-EM density map. The  
885 mobile loops extending from the bottom of the co-chaperonin are shown (left). The  
886 enlarged picture shows the roof regions of Cpn23 and Cpn20C.

887 **(C)** Interaction between ClpP and co-chaperonin. The central axes of co-chaperonin  
888 and CrClpP are given as black lines. The tilted angle between the axes of  
889 co-chaperonin and CrClpP complex has a value of  $4^\circ$ .

890 **(D)** Top view of the extra densities located in the hydrophobic clefts at the top ring of  
891 ClpP. The densities colored in red were confidently identified as mobile loops from  
892 Cpn11 and Cpn20C. The densities colored in orange might be the mobile loops from  
893 Cpn20N. The regions encircled with a broken red line are the two remaining clefts in  
894 which no additional densities could be identified.

895 **(E)** Insertion of the mobile loops of Cpn11 and Cpn20C into the hydrophobic clefts at  
896 the surface of the top ring of ClpP.

897 **(F)** Cartoon presentation of the interaction between the top ring of ClpP and  
898 Cpn11/20/23. Red arrowheads indicate the hydrophobic clefts. High-confidence  
899 mobile loops inserted into the clefts are indicated by solid lines, low-confidence  
900 mobile loops inserted into the clefts are indicated by broken lines.

901



Figure 1 Wang et al

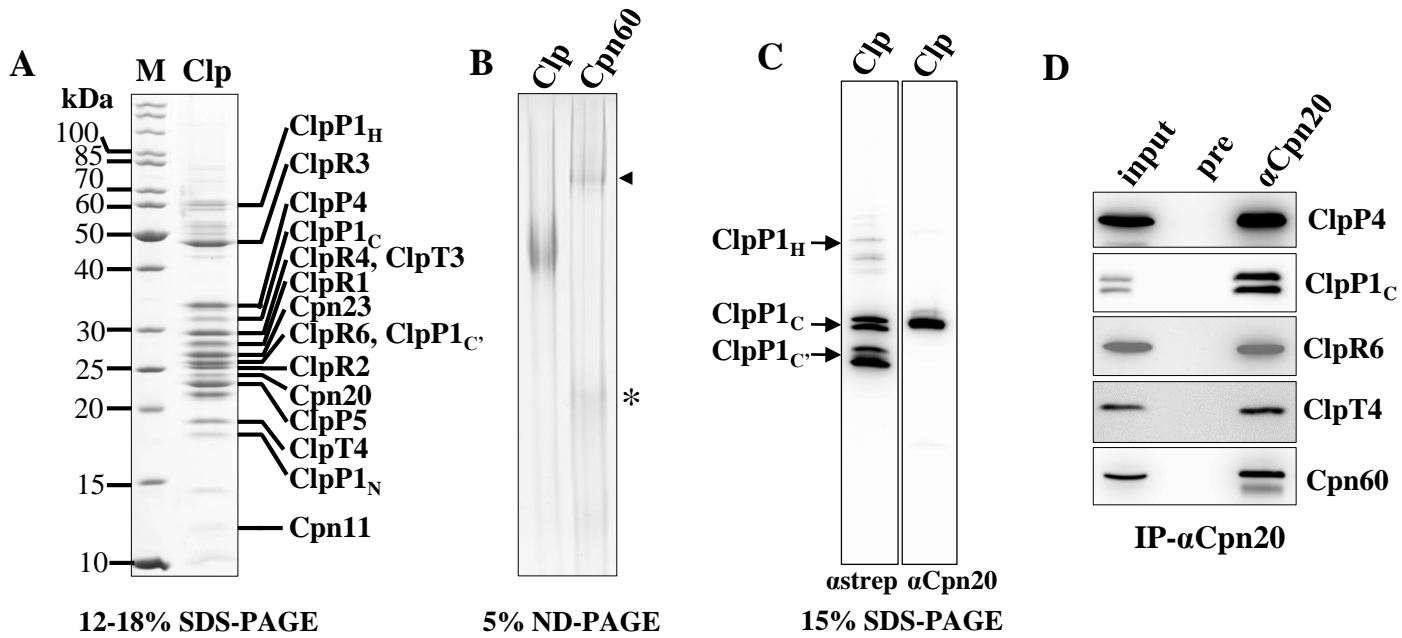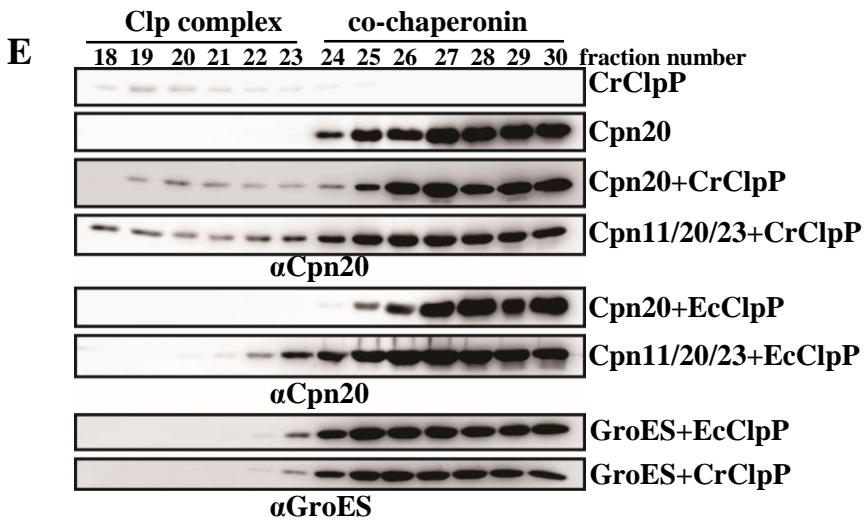

Figure 2 Wang et al

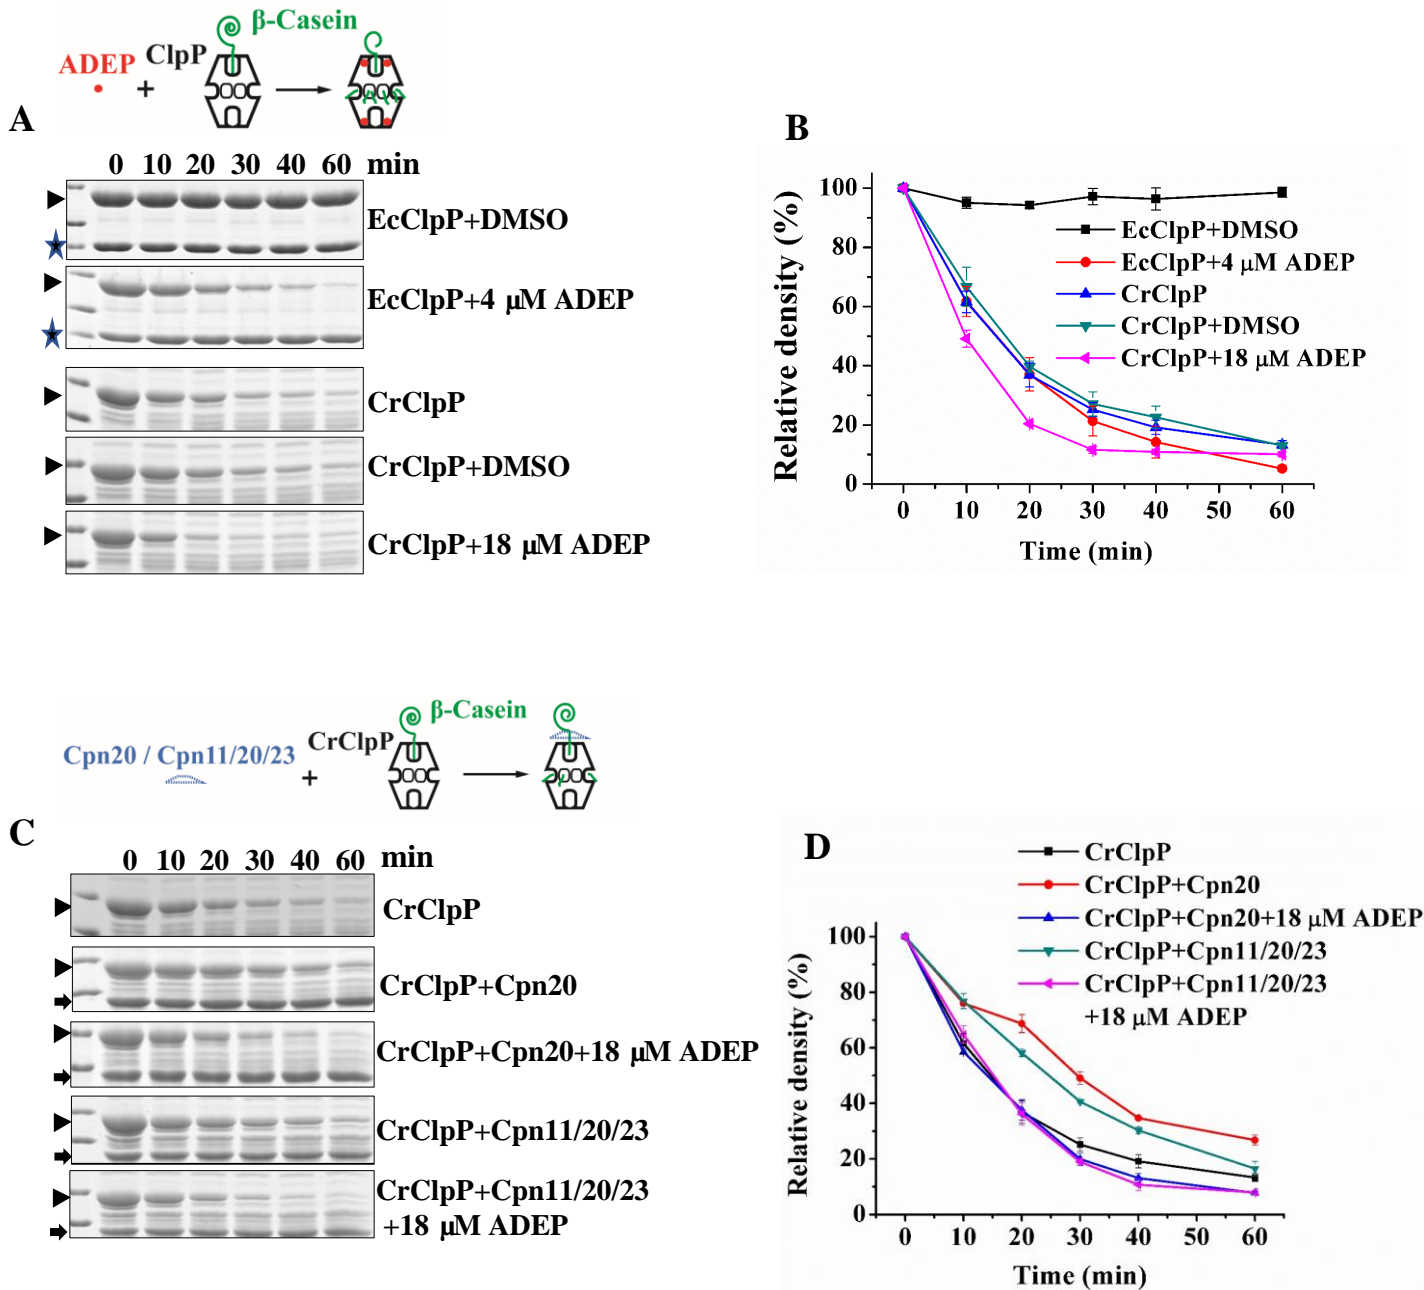

Figure 3 Wang et al

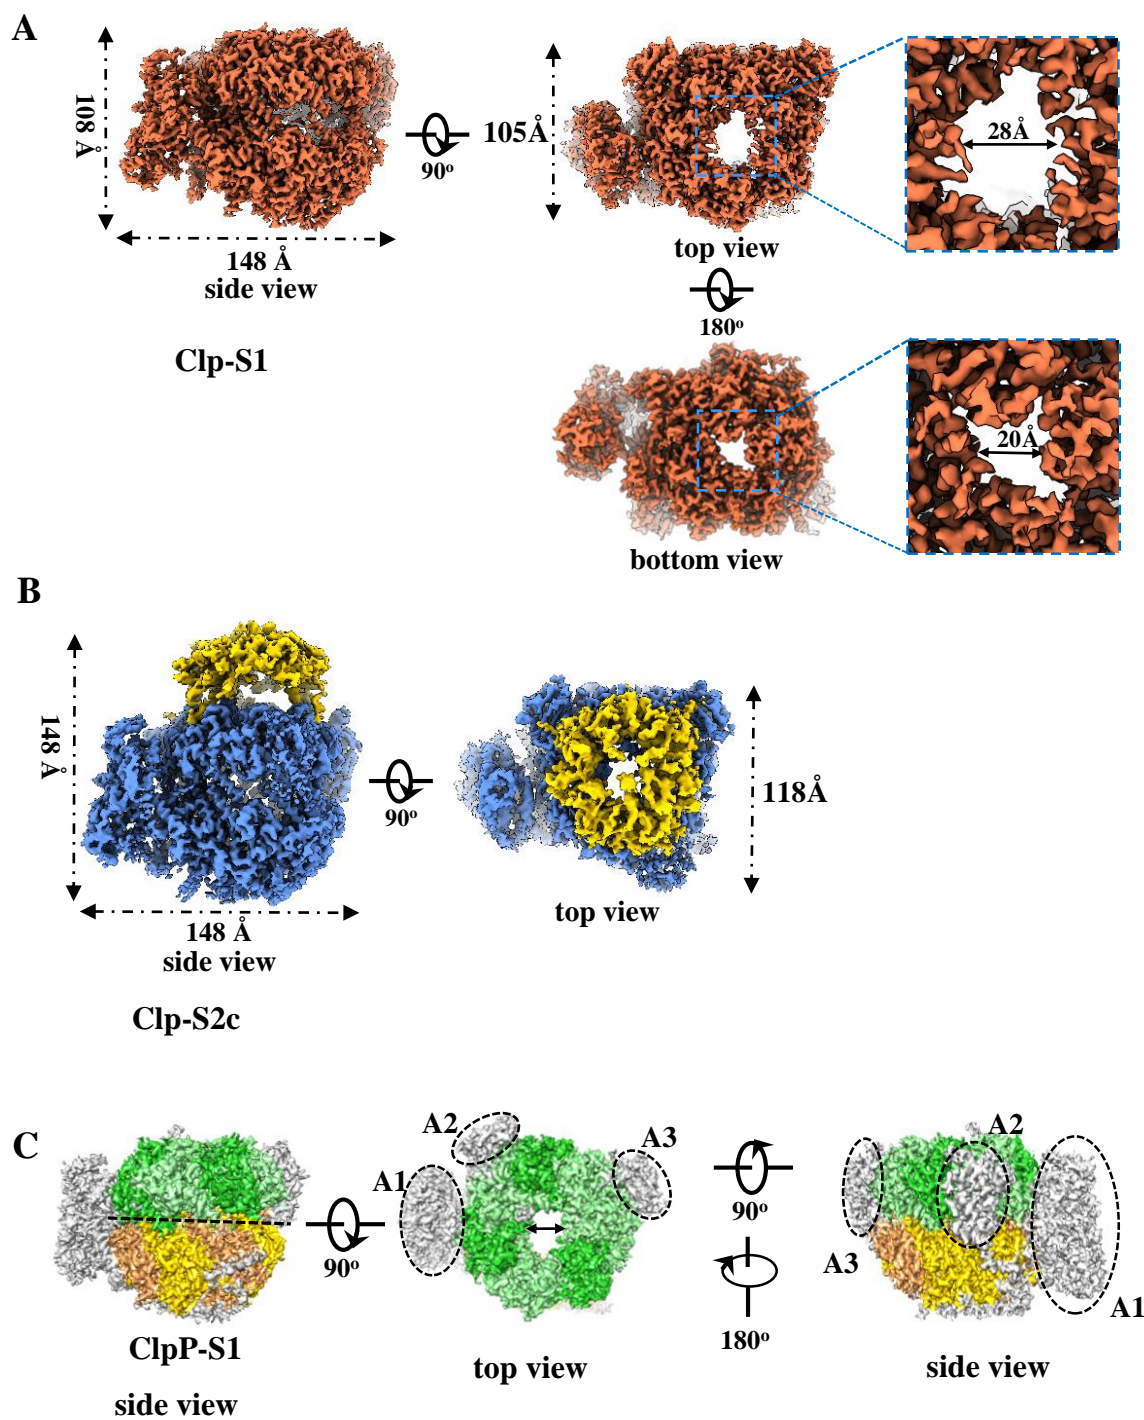

Figure 4 Wang et al

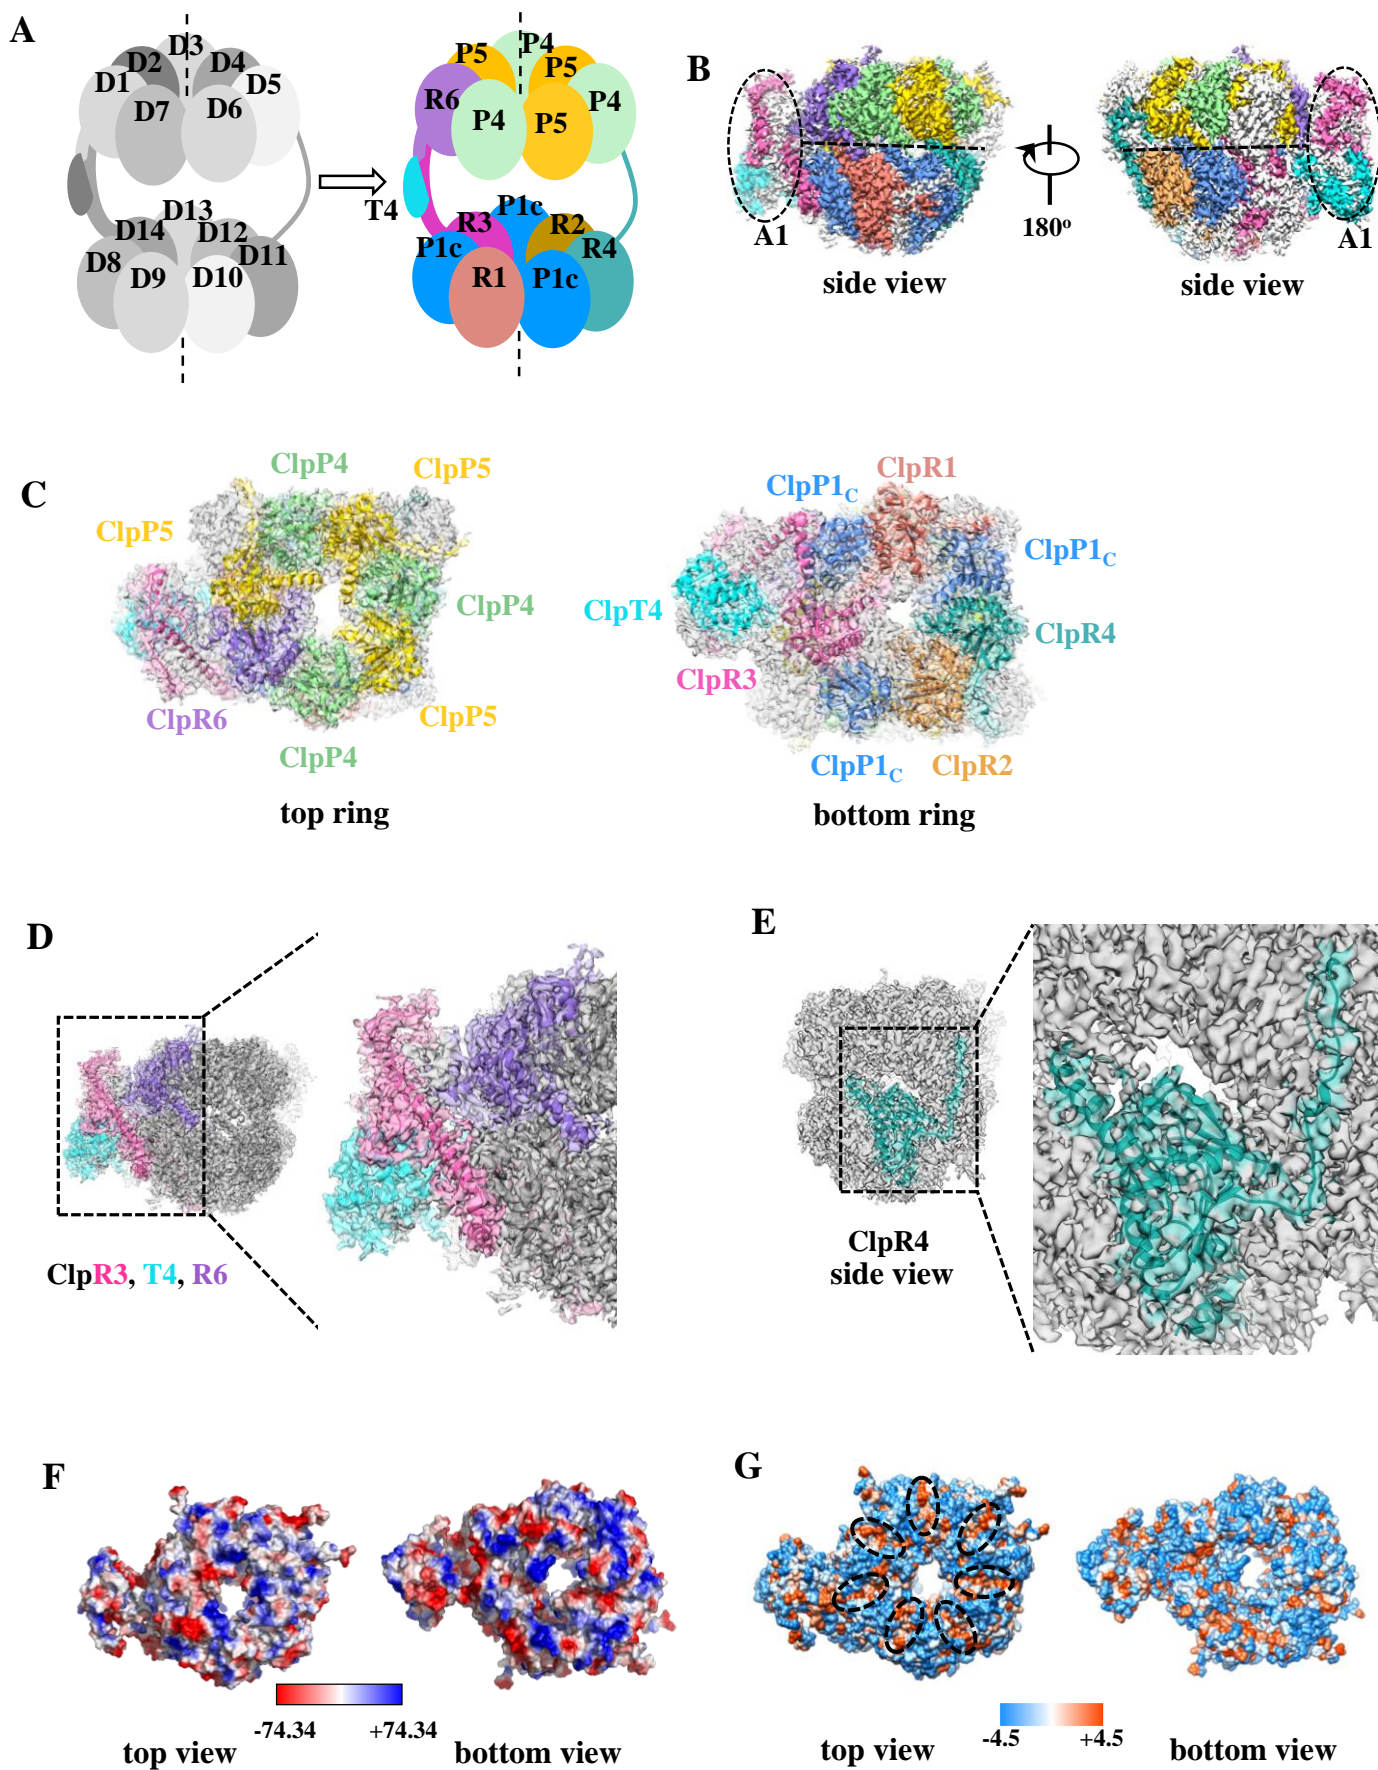

Source: https://biorxiv.org/content/10.1101/2021.07.26.453741v1.full.pdf
